# Supplementary material
Source: publisher figshare collection journal article supplement (https://rs.figshare.com/ndownloader/files/13348136)
Supplement: Supplementary file 1 [file 13348136]

## README

===== README.TXT =====

All Authors: Sachin Y. Shinde and Jaywant H. Arakeri

Title: Physics of unsteady thrust and flow generation by a flexible surface flapping in the absence of free stream

Description:

Movie1.avi - This file shows the particle visualization movie for airfoil with flexible flap.

Movie2.avi - This file shows the particle visualization movie for airfoil without flexible flap, i.e., with rigid trailing edge.

Total No. of Files: 4

Filenames: README.TXT, Movie1.avi, Movie2.avi, Supp\_Material\_PRS.pdf

Filetypes: video (.avi), Acrobat (.pdf), and txt.

Special Instructions: The movie files are in Windows Media Player .avi format. They play in RealPlayer as well.

Contact information:

Dr. Sachin Y. Shinde  
Department of Mechanical Engineering,  
Indian Institute of Technology,  
Kanpur 208016,  
India  
Phone: +91 512 259 6939  
Email: sachint@iitk.ac.in

=====
